# Supplementary material for: A lipid droplet-specific fluorescence probe for atherosclerotic plaque imaging
Source: Royal Society of Chemistry journal article supplement (doi:10.1039/d1an01937f), 2022-01-01
Supplement: d1an01937f2.pdf [file d1an01937f2.pdf]

## **A lipid droplet specific fluorescent probe for atherosclerotic plaque imaging**

Jingruo Chen<sup>a, †</sup>, Shufen Li<sup>a, †</sup>, Di Ma<sup>b</sup>, Lilan Li<sup>a</sup>, Weihua Zhuang<sup>a, \*</sup> and Mao Chen<sup>a, b, c, \*</sup>

<sup>a</sup> Laboratory of Heart Valve Disease, West China Hospital, Sichuan University, 37 Guoxue Road, Chengdu 610041, China.

<sup>b</sup> Regenerative Medicine Research Center, West China Hospital, Sichuan University, Chengdu 610041, China.

<sup>c</sup> Department of Cardiology, West China Hospital, Sichuan University, 37 Guoxue Road, Chengdu 610041, China

<sup>†</sup>These authors contributed equally to this work.

\* Corresponding author: Weihua Zhuang and Mao Chen

E-mail: weihuaz@scu.edu.cn and hmaochen@vip.sina.com

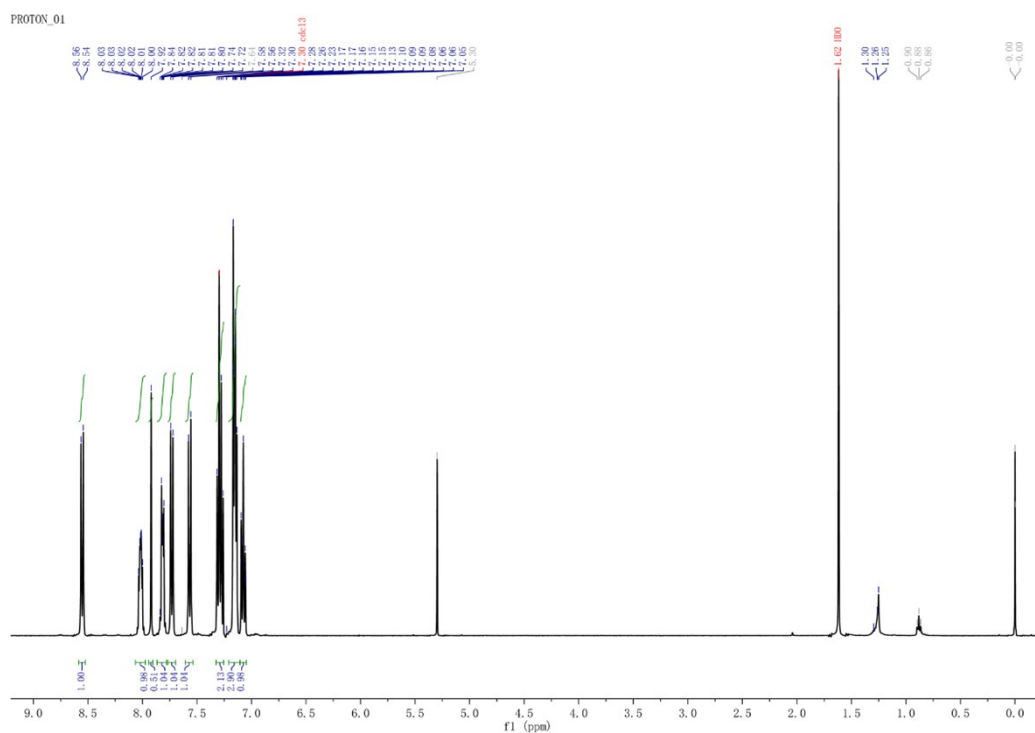

Fig. S1  $^1\text{H}$  NMR spectrum of TBI in  $\text{CDCl}_3$ .

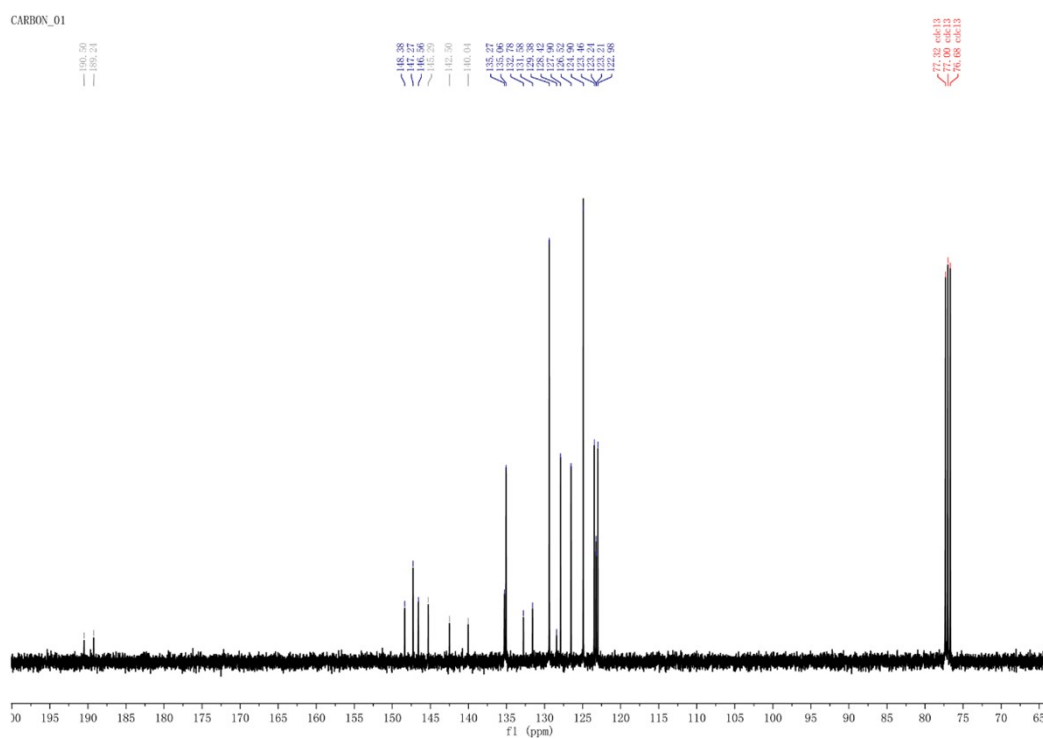

Fig. S2  $^{13}\text{C}$  NMR spectrum of TBI in  $\text{CDCl}_3$ .

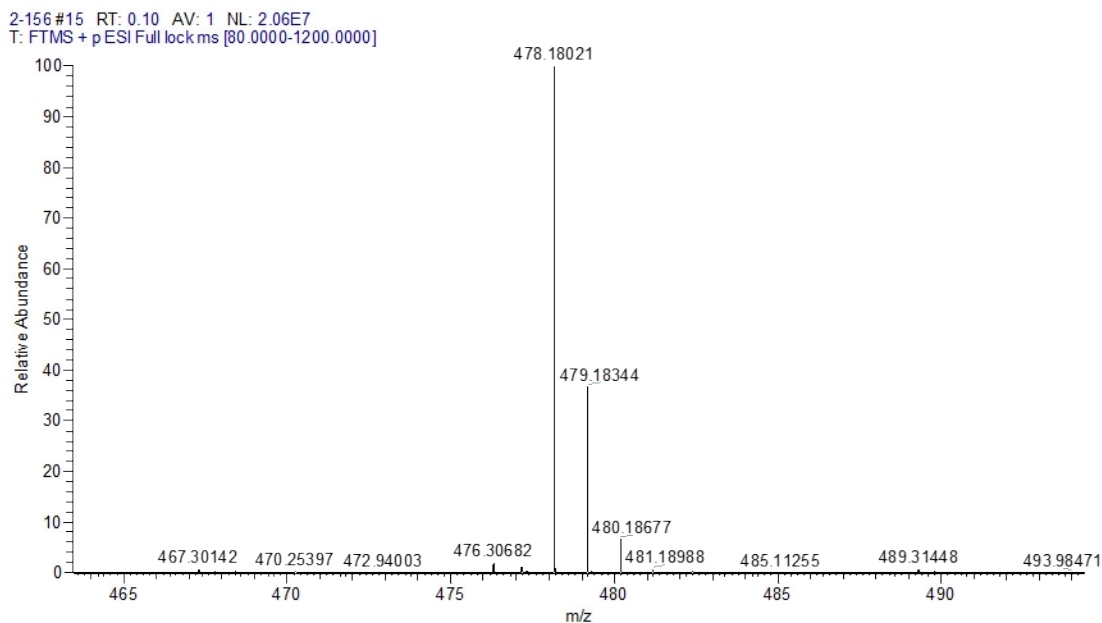

**Fig. S3** HR-MS of TBI.

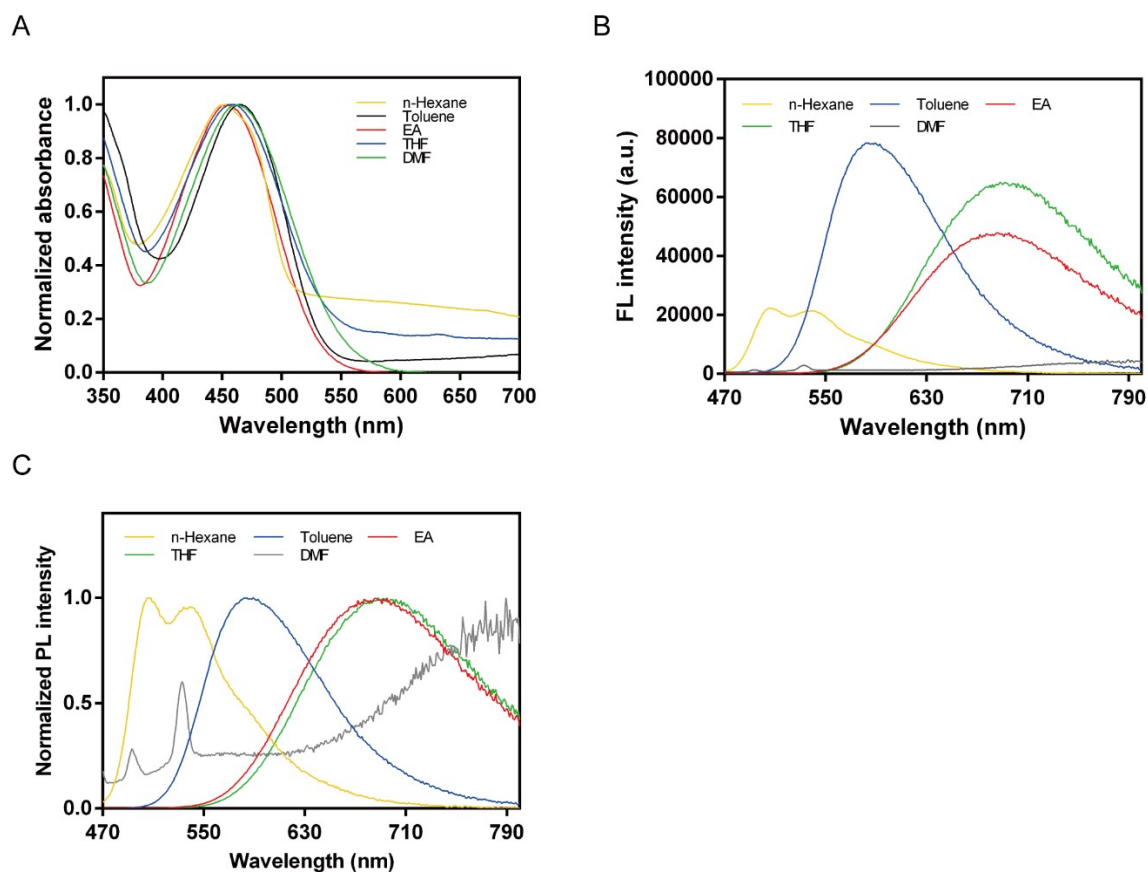

**Fig. S4** (A) Normalized absorbance of **TBI** in various organic solvents (5  $\mu$ M). (B) Emission spectra of **TBI** in various organic solvents (5  $\mu$ M). (C) Normalized emission spectra of **TBI** in various organic solvents (5  $\mu$ M).

A

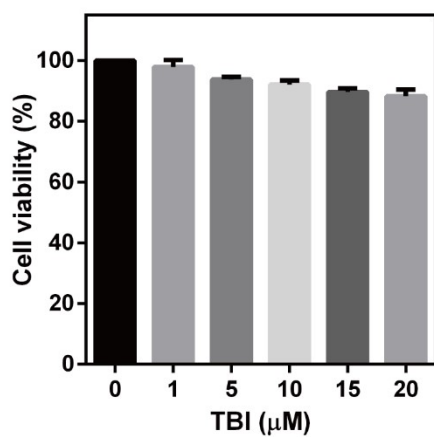

B

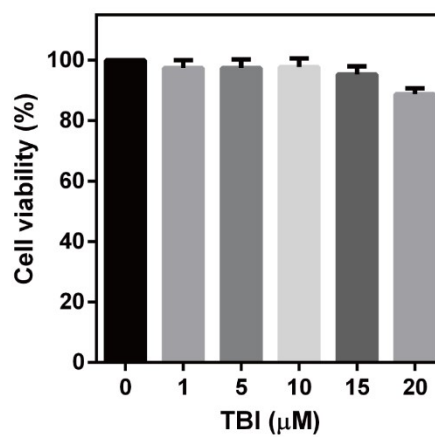

**Fig. S5** Relative cell viability of HeLa cells (A) and Raw 264.7 cells (B) treated with different concentrations (0, 1, 5, 10, 15 and 20 μM) of **TBI** for 24 h.

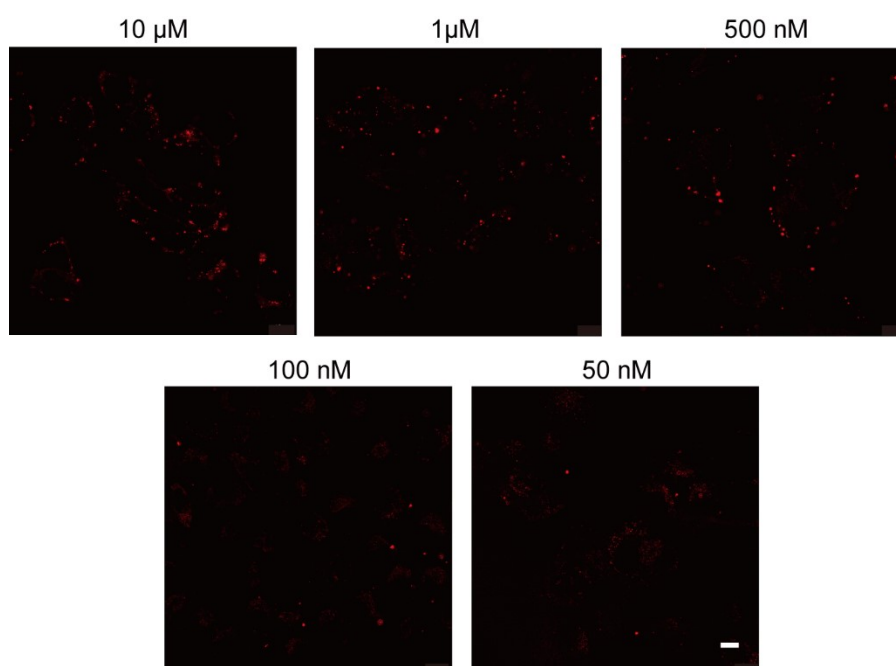

**Fig. S6** CLSM images of HeLa cells stained with different concentrations of **TBI** (10 μM, 1 μM, 500 nM, 100 nM and 50 nM),  $\lambda_{\text{ex}} = 488 \text{ nm}$ ,  $\lambda_{\text{em}} = 570\text{-}620 \text{ nm}$ ; Scale bar: 10 μm.

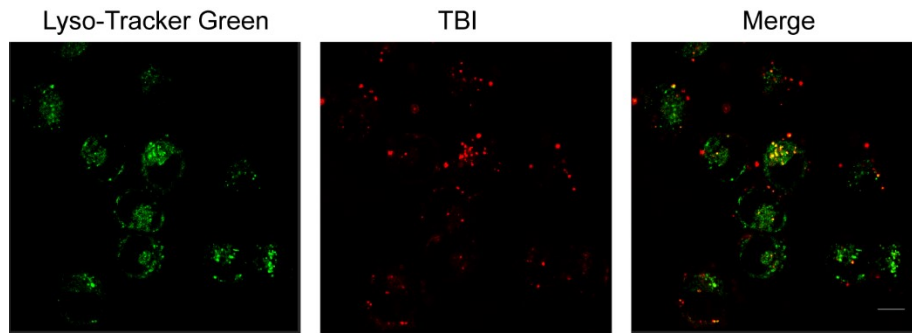

**Fig. S7** Co-staining images of HeLa cells with **TBI** ( $1 \mu\text{M}$ ,  $\lambda_{\text{ex}} = 488 \text{ nm}$ ,  $\lambda_{\text{em}} = 570\text{-}620 \text{ nm}$ ) and Lyso-Tracker Green ( $50 \text{ nM}$ ,  $\lambda_{\text{ex}} = 488 \text{ nm}$ ,  $\lambda_{\text{em}} = 500\text{-}550 \text{ nm}$ ).

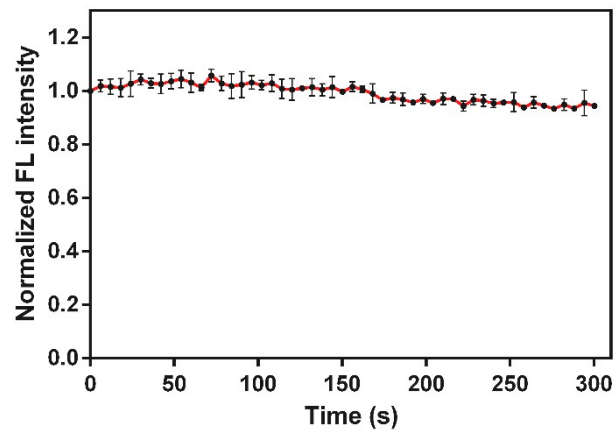

**Fig. S8** Photobleaching curves of the fluorescence intensity of **TBI** staining HeLa cells during laser scanning for 5 min.

A

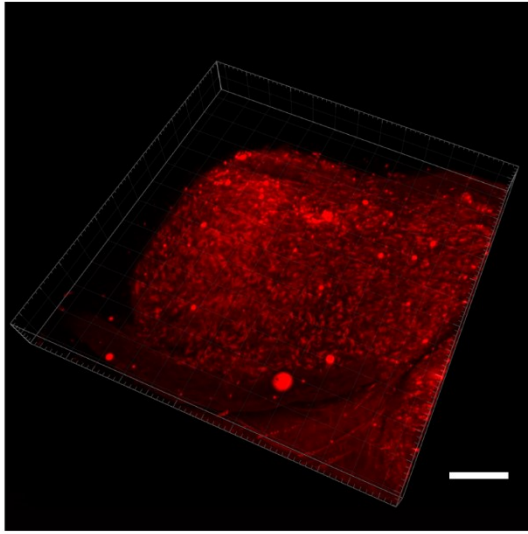

B

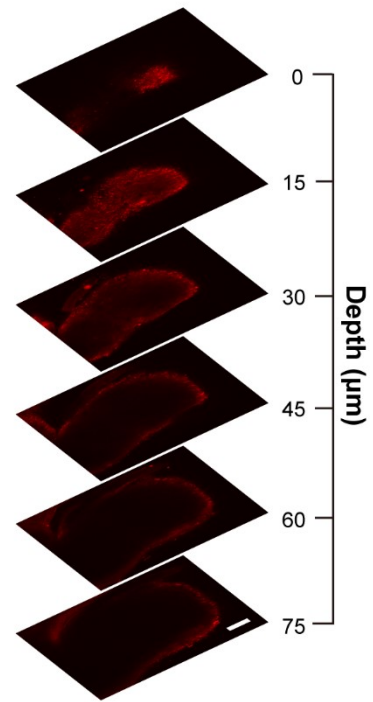

**Fig. S9** (A) 3D reconstructed images of the atherosclerotic plaques stained with **TBI** (1  $\mu\text{M}$ ,  $\lambda_{\text{ex}} = 488 \text{ nm}$ ,  $\lambda_{\text{em}} = 570\text{-}620 \text{ nm}$ ). Scale bar: 100  $\mu\text{m}$ . (B) CLSM images of the atherosclerotic plaques at various imaging depths.
